# Supplementary material for: Early impact of the DREAMS partnership on young women’s knowledge of their HIV status: causal analysis of population-based surveys in Kenya and South Africa
Source: HighWire-hosted journal article supplement (doi:10.1136/jech-2020-216042), 2021-09-13
Supplement: jech-2020-216042supp002_data_supplement.pdf [file jech-2020-216042supp002_data_supplement.pdf]

## Supplementary Information

**Table S1(a).** Knowledge of HIV Status among young women in Nairobi, Kenya: levels and associations with DREAMS invitation and key confounding variables estimated using conventional logistic regression

|                          | Total<br>N | Knows HIV Status<br>n (%) | Unadjusted<br>OR (95% CI) | Age- and Location-<br>Adjusted OR (95% CI) | Fully Adjusted*<br>OR (95% CI) | p value** |
|--------------------------|------------|---------------------------|---------------------------|--------------------------------------------|--------------------------------|-----------|
| <b>DREAMS Invitation</b> |            |                           |                           |                                            |                                |           |
| Not Invited              | 545        | 378 (69.4%)               | 1.00                      | 1.00                                       | 1.00                           | < 0.001   |
| Invited                  | 536        | 494 (92.2%)               | 5.20 (3.61, 7.48)         | 7.32 (4.99, 10.75)                         | 8.69 (5.84, 12.93)             |           |
| <b>Age &amp; Site</b>    |            |                           |                           |                                            |                                |           |
| Age Group                |            |                           |                           |                                            |                                |           |
| 15-17 Years              | 547        | 414 (75.7%)               | 1.00                      | 1.00                                       | --                             | --        |
| 18-22 Years              | 534        | 458 (85.8%)               | 1.94 (1.42, 2.64)         | 1.93 (1.41, 2.64)                          | N/A^                           |           |
| Age                      |            |                           |                           |                                            |                                |           |
| 15                       | 156        | 114 (73.1%)               | 1.20 (1.12, 1.30)         | 1.20 (1.12, 1.29)                          | 1.06 (0.93, 1.21)              | 0.41      |
| 16                       | 203        | 152 (74.9%)               |                           |                                            |                                |           |
| 17                       | 188        | 148 (78.7%)               |                           |                                            |                                |           |
| 18                       | 138        | 110 (79.7%)               |                           |                                            |                                |           |
| 19                       | 95         | 83 (87.4%)                |                           |                                            |                                |           |
| 20                       | 102        | 85 (83.3%)                |                           |                                            |                                |           |
| 21                       | 94         | 84 (89.4%)                |                           |                                            |                                |           |
| 22                       | 105        | 96 (91.4%)                |                           |                                            |                                |           |
| Location                 |            |                           |                           |                                            |                                |           |
| Korogocho                | 617        | 482 (78.1%)               | 1.00                      | 1.00                                       | 1.00                           | 0.30      |
| Viwandani                | 464        | 390 (84.1%)               | 1.48 (1.08, 2.02)         | 1.45 (1.06, 2.00)                          | 1.22 (0.84, 1.76)              |           |
| <b>Education</b>         |            |                           |                           |                                            |                                |           |

**Current School**

|                         |     |             |                   |                   |                   |      |
|-------------------------|-----|-------------|-------------------|-------------------|-------------------|------|
| Not Currently in School | 455 | 395 (86.8%) | 1.00              | 1.00              | 1.00              | 0.80 |
| Currently in School     | 626 | 477 (76.2%) | 0.49 (0.35, 0.68) | 0.68 (0.46, 1.01) | 1.07 (0.65, 1.77) |      |

**Highest Education**

|                    |     |             |                   |                   |                   |       |
|--------------------|-----|-------------|-------------------|-------------------|-------------------|-------|
| Primary Incomplete | 125 | 91 (72.8%)  | 1.00              | 1.00              | 1.00              | 0.288 |
| Primary Grade 8    | 217 | 180 (82.9%) | 1.82 (1.07, 3.09) | 1.56 (0.90, 2.69) | 1.62 (0.87, 3.02) |       |
| Secondary Form 1   | 154 | 120 (77.9%) | 1.32 (0.76, 2.28) | 1.47 (0.84, 2.59) | 1.48 (0.77, 2.84) |       |
| Secondary Form 2   | 187 | 159 (85.0%) | 2.12 (1.21, 3.72) | 1.88 (1.06, 3.36) | 2.31 (1.19, 4.51) |       |
| Secondary Form 3   | 150 | 120 (80.0%) | 1.49 (0.85, 2.62) | 1.13 (0.63, 2.04) | 1.66 (0.82, 3.36) |       |
| Secondary Form 4   | 198 | 161 (81.3%) | 1.63 (0.96, 2.77) | 0.76 (0.42, 1.40) | 1.39 (0.67, 2.88) |       |
| Tertiary           | 50  | 41 (82.0%)  | 1.70 (0.75, 3.87) | 0.67 (0.27, 1.66) | 1.07 (0.37, 3.08) |       |

**Socio-economic Status****Household Assets**

|                    |     |             |                   |                   |                   |      |
|--------------------|-----|-------------|-------------------|-------------------|-------------------|------|
| Low Asset Score    | 360 | 293 (81.4%) | 1.00              | 1.00              | 1.00              | 0.61 |
| Middle Asset Score | 361 | 294 (81.4%) | 1.03 (0.71, 1.50) | 0.97 (0.67, 1.43) | 0.80 (0.51, 1.25) |      |
| High Asset Score   | 360 | 285 (79.2%) | 0.88 (0.61, 1.27) | 0.89 (0.61, 1.29) | 0.87 (0.56, 1.34) |      |

**Poverty Perception**

|                 |     |             |                   |                   |                   |      |
|-----------------|-----|-------------|-------------------|-------------------|-------------------|------|
| Very poor       | 139 | 120 (86.3%) | 1.00              | 1.00              | 1.00              | 0.23 |
| Moderately poor | 858 | 690 (80.4%) | 0.65 (0.39, 1.09) | 0.67 (0.40, 1.13) | 0.69 (0.38, 1.25) |      |
| Not poor        | 84  | 62 (73.8%)  | 0.45 (0.22, 0.89) | 0.47 (0.23, 0.94) | 0.49 (0.22, 1.11) |      |

**Credit Access**

|                     |     |             |                   |                   |                   |      |
|---------------------|-----|-------------|-------------------|-------------------|-------------------|------|
| No Access to Credit | 550 | 443 (80.5%) | 1.00              | 1.00              | 1.00              | 0.39 |
| Access to Credit    | 483 | 391 (81.0%) | 1.03 (0.75, 1.40) | 1.04 (0.76, 1.43) | 1.05 (0.73, 1.50) |      |
| Don't Know          | 48  | 38 (79.2%)  | 0.92 (0.44, 1.90) | 0.99 (0.47, 2.08) | 1.75 (0.77, 3.98) |      |

**Sexual/Reproductive History****Ever Had Sex**

|                              |     |             |                   |                   |                   |        |
|------------------------------|-----|-------------|-------------------|-------------------|-------------------|--------|
| Ever Had Sex                 | 437 | 401 (91.8%) | 1.00              | 1.00              | --                | --     |
| Never Had Sex or Undisclosed | 644 | 471 (73.1%) | 0.24 (0.17, 0.36) | 0.25 (0.16, 0.41) | N/A^^             |        |
| Ever Pregnant                |     |             |                   |                   |                   |        |
| Ever Pregnant                | 299 | 282 (94.3%) | 1.00              | 1.00              | 1.00              | < .001 |
| Never Had Sex                | 644 | 471 (73.1%) | 0.16 (0.10, 0.28) | 0.16 (0.09, 0.29) | 0.09 (0.04, 0.19) |        |
| Ever had sex, never Pregnant | 138 | 119 (86.2%) | 0.38 (0.19, 0.75) | 0.37 (0.18, 0.74) | 0.32 (0.15, 0.69) |        |

^ Age was included as a continuous variable

^^ Ever Had Sex was not included in the multivariable models, because of using a "composite" variable combining information on sexual behaviour and pregnancy

\* Fully adjusted model is adjusted for the minimal set of confounding variables identified from the DAG (i.e. all variables presented in table; excluding 'Ever Had Sex')

\*\* p value is from likelihood ratio test, from 'fully adjusted' model

**Table S1(b).** Knowledge of HIV status among young women in uMkhanyakude, South Africa: levels and associations with DREAMS invitation and key confounding variables estimated using conventional logistic regression

|                                                     | Total<br>N | Knows HIV Status<br>N (%) | Unadjusted OR<br>OR (95%CI) | Age and Location<br>Adjusted OR (95%CI) | Fully Adjusted*<br>OR (95%CI) | p-value |
|-----------------------------------------------------|------------|---------------------------|-----------------------------|-----------------------------------------|-------------------------------|---------|
| <b>DREAMS invitation</b>                            |            |                           |                             |                                         |                               |         |
| Not invited                                         | 1537       | 711 (46.3%)               | 1                           | 1                                       | 1                             | 0.003   |
| Invited                                             | 636        | 266 (41.8%)               | 0.84 (0.69, 1.01 )          | 1.27 ( 1.03, 1.57 )                     | 1.40 (1.12, 1.75 )            |         |
| <b>Age group</b>                                    |            |                           |                             |                                         |                               |         |
| 13-17                                               | 1143       | 348 (30.4%)               | 1                           | 1                                       |                               |         |
| 18-22                                               | 1030       | 629 (61.1%)               | 3.58 (3.00, 4.28 )          | 0.81 ( 0.57, 1.15 )                     |                               |         |
| <b>Age</b>                                          |            |                           |                             |                                         |                               |         |
| 13                                                  | 236        | 34 (14.4%)                | 1.34 (1.29, 1.39)           | 1.34 (1.29, 1.39)                       | 1.20 (1.14, 1.27)             | <0.001  |
| 14                                                  | 222        | 35 (15.8%)                |                             |                                         |                               |         |
| 15                                                  | 232        | 79 (34.1%)                |                             |                                         |                               |         |
| 16                                                  | 240        | 93 (38.8%)                |                             |                                         |                               |         |
| 17                                                  | 213        | 107 (50.2%)               |                             |                                         |                               |         |
| 18                                                  | 243        | 128 (52.7%)               |                             |                                         |                               |         |
| 19                                                  | 228        | 125 (54.8%)               |                             |                                         |                               |         |
| 20                                                  | 242        | 155 (64.1%)               |                             |                                         |                               |         |
| 21                                                  | 174        | 128 (73.6%)               |                             |                                         |                               |         |
| 22                                                  | 143        | 93 (65.0%)                |                             |                                         |                               |         |
| <b>Location</b>                                     |            |                           |                             |                                         |                               |         |
| Rural                                               | 1383       | 627 (45.3%)               | 1                           | 1                                       | 1                             | 0.782   |
| Peri-urban/urban                                    | 771        | 339 (44.0%)               | 0.95 (0.79, 1.13 )          | 0.97 ( 0.80, 1.18 )                     | 0.97 (0.79, 1.20 )            |         |
| <b>Socio-economic Status<br/>(Household assets)</b> |            |                           |                             |                                         |                               |         |
| Low                                                 | 723        | 328 (45.4%)               | 1                           | 1                                       | 1                             | 0.939   |
| Middle                                              | 743        | 342 (46.0%)               | 1.03 (0.84, 1.26 )          | 1.03 ( 0.83, 1.29 )                     | 1.04 (0.82, 1.32 )            |         |
| High                                                | 598        | 254 (42.5%)               | 0.89 (0.71, 1.11 )          | 0.94 ( 0.74, 1.20 )                     | 1.01 (0.78, 1.30 )            |         |

|                                            |      |             |                    |                     |                    |        |
|--------------------------------------------|------|-------------|--------------------|---------------------|--------------------|--------|
| <b>Currently in school</b>                 |      |             |                    |                     |                    |        |
| No                                         | 538  | 348 (64.7%) | 1                  | 1                   | 1                  | 0.411  |
| Yes                                        | 1635 | 629 (38.5%) | 0.34 (0.28, 0.42 ) | 0.94 ( 0.73, 1.22 ) | 1.19 (0.79, 1.80 ) |        |
| <b>Highest level of education achieved</b> |      |             |                    |                     |                    |        |
| Primary                                    | 206  | 53 (25.7%)  | 1                  | 1                   | 1                  | 0.25   |
| Secondary                                  | 1628 | 716 (44.0%) | 2.27 (1.63, 3.14 ) | 1.22 ( 0.85, 1.75 ) | 1.38 (0.94, 2.04 ) |        |
| Completed Secondary/Tertiary               | 337  | 208 (61.7%) | 4.65 (3.18, 6.82 ) | 0.99 ( 0.63, 1.56 ) | 1.22 (0.72, 2.09 ) |        |
| <b>Ever migrated</b>                       |      |             |                    |                     |                    |        |
| No                                         | 1771 | 741 (41.8%) | 1                  | 1                   |                    |        |
| Yes                                        | 402  | 236 (58.7%) | 1.98 (1.59, 2.46 ) | 0.99 ( 0.77, 1.26 ) |                    |        |
| <b>Food insecurity</b>                     |      |             |                    |                     |                    |        |
| No                                         | 1495 | 612 (40.9%) | 1                  | 1                   |                    |        |
| Yes                                        | 678  | 365 (53.8%) | 1.68 (1.40, 2.02 ) | 1.27 ( 1.04, 1.55 ) |                    |        |
| <b>Ever been/currently pregnant</b>        |      |             |                    |                     |                    |        |
| No                                         | 1570 | 523 (33.3%) | 1                  | 1                   |                    |        |
| Yes                                        | 553  | 419 (75.8%) | 6.26 (5.02, 7.81 ) | 3.58 ( 2.78, 4.61 ) |                    |        |
| <b>Sexual &amp; pregnancy history</b>      |      |             |                    |                     |                    |        |
| Ever pregnant                              | 553  | 419 (75.8%) | 1                  | 1                   | 1                  | <0.001 |
| Never pregnant & sexually active^          | 248  | 127 (51.2%) | 0.34 (0.24, 0.46 ) | 0.38 ( 0.27, 0.52 ) | 0.34 (0.24, 0.48 ) |        |
| Never pregnant & not sexually active       | 39   | 20 (51.3%)  | 0.34 (0.17, 0.65 ) | 0.38 ( 0.20, 0.75 ) | 0.34 (0.17, 0.67 ) |        |
| Never had sex                              | 1272 | 371 (29.2%) | 0.13 (0.10, 0.17 ) | 0.23 ( 0.18, 0.31 ) | 0.21 (0.16, 0.29 ) |        |

\* Adjusted for the minimal set of confounders from DAG: Age, urban/rural location, SES, education, sexual & pregnancy history ('Ever been pregnant' was not included due to the inclusion of the "composite" variable combining information on sexual and pregnancy history).

^ 'Sexually active' is Yes for those who reported  $\geq 1$  sexual partner in the previous 12 months.

**Supplementary S2(a):** Knowledge of HIV status: levels and associations with DREAMS invitation and key confounding variables estimated using conventional logistic regression in Nairobi, among 15-17 year olds

|                          | Total<br>N | Knows Status<br>n (%) | Unadjusted<br>OR (95% CI) | Age and Site Adjusted<br>OR (95% CI) | Fully Adjusted*<br>OR (95% CI) | p value** |
|--------------------------|------------|-----------------------|---------------------------|--------------------------------------|--------------------------------|-----------|
| <b>DREAMS Invitation</b> |            |                       |                           |                                      |                                |           |
| Not Invited              | 225        | 123 (54.7%)           | 1.00                      | 1.00                                 | 1.00                           | < 0.001   |
| Invited                  | 322        | 291 (90.4%)           | 7.78 (4.94, 12.26)        | 7.90 (4.99, 12.51)                   | 9.45 (5.82, 15.36)             |           |
| <b>Age &amp; Site</b>    |            |                       |                           |                                      |                                |           |
| Age                      |            |                       |                           |                                      |                                |           |
| 15                       | 156        | 114 (73.1%)           | 1.17 (0.91, 1.50)         | 1.18 (0.92, 1.51)                    | 1.01 (0.73, 1.41)              | 0.93      |
| 16                       | 203        | 152 (74.9%)           |                           |                                      |                                |           |
| 17                       | 188        | 148 (78.7%)           |                           |                                      |                                |           |
| Site                     |            |                       |                           |                                      |                                |           |
| Korogocho                | 317        | 229 (72.2%)           | 1.00                      | 1.00                                 | 1.00                           | 0.91      |
| Viwandani                | 230        | 185 (80.4%)           | 1.58 (1.05, 2.38)         | 1.59 (1.06, 2.39)                    | 1.03 (0.62, 1.71)              |           |
| <b>Education</b>         |            |                       |                           |                                      |                                |           |
| Current School           |            |                       |                           |                                      |                                |           |
| Not Currently in School  | 88         | 67 (76.1%)            | 1.00                      | 1.00                                 | 1.00                           | 0.31      |
| Currently in School      | 459        | 347 (75.6%)           | 0.97 (0.57, 1.66)         | 0.99 (0.57, 1.72)                    | 1.48 (0.70, 3.13)              |           |
| Highest Education        |            |                       |                           |                                      |                                |           |
| Primary Incomplete       | 82         | 52 (63.4%)            | 1.00                      | 1.00                                 | 1.00                           | 0.18      |
| Primary Grade 8          | 119        | 87 (73.1%)            | 1.57 (0.86, 2.87)         | 1.49 (0.81, 2.75)                    | 1.66 (0.79, 3.46)              |           |
| Secondary Form 1         | 129        | 98 (76.0%)            | 1.82 (1.30, 3.34)         | 1.68 (0.91, 3.10)                    | 1.76 (0.85, 3.64)              |           |
| Secondary Form 2         | 121        | 101 (83.5%)           | 2.91 (1.51, 5.62)         | 2.58 (1.30, 5.12)                    | 3.18 (1.42, 7.15)              |           |
| Secondary Form 3         | 75         | 61 (81.3%)            | 2.51 (1.21, 5.24)         | 2.07 (0.94, 4.55)                    | 2.52 (0.97, 6.54)              |           |

|                                       |     |             |                    |                    |                    |        |
|---------------------------------------|-----|-------------|--------------------|--------------------|--------------------|--------|
| Secondary Form 4                      | 17  | 12 (70.5%)  | 1.38 (0.44, 4.31)  | 1.15 (0.35, 3.77)  | 3.10 (0.78, 12.31) |        |
| Tertiary                              | 4   | 3 (75.0%)   | 1.73 (0.17, 17.39) | 1.23 (0.12, 12.86) | 3.68 (0.31, 44.13) |        |
| <b>SES</b>                            |     |             |                    |                    |                    |        |
| Household Assets                      |     |             |                    |                    |                    |        |
| Low Asset Score                       | 197 | 157 (79.7%) | 1.00               | 1.00               | 1.00               | 0.37   |
| Middle Asset Score                    | 184 | 131 (71.2%) | 0.80 (0.49, 1.32)  | 0.81 (0.49, 1.34)  | 0.75 (0.42, 1.36)  |        |
| High Asset Score                      | 166 | 126 (75.9%) | 0.63 (0.39, 1.01)  | 0.65 (0.41, 1.05)  | 0.67 (0.38, 1.19)  |        |
| Poverty Perception                    |     |             |                    |                    |                    |        |
| Very poor                             | 66  | 54 (81.8%)  | 1.00               | 1.00               | 1.00               | 0.41   |
| Moderately poor                       | 435 | 326 (74.9%) | 0.66 (0.34, 1.29)  | 0.67 (0.34, 1.29)  | 0.59 (0.27, 1.30)  |        |
| Not poor                              | 46  | 34 (73.9%)  | 0.63 (0.25, 1.56)  | 0.62 (0.25, 1.55)  | 0.61 (0.20, 1.84)  |        |
| Credit Access                         |     |             |                    |                    |                    |        |
| No Access to Credit                   | 270 | 199 (73.8%) | 1.00               | 1.00               | 1.00               | 0.19   |
| Access to Credit                      | 248 | 191 (77.0%) | 1.20 (0.80, 1.79)  | 1.21 (0.81, 1.81)  | 1.10 (0.68, 1.77)  |        |
| Don't Know                            | 29  | 24 (82.8%)  | 1.71 (0.63, 4.66)  | 1.61 (0.59, 4.43)  | 2.77 (0.87, 8.77)  |        |
| <b>Sexual &amp; Pregnancy history</b> |     |             |                    |                    |                    |        |
| Ever Had Sex                          |     |             |                    |                    |                    |        |
| Ever Had Sex                          | 66  | 60 (90.1%)  | 1.00               | 1.00               | --                 | --     |
| Never Had Sex or Undisclosed          | 481 | 354 (73.6%) | 0.28 (0.12, 0.66)  | 0.30 (0.12, 0.71)  | N/A^^              |        |
| Ever Pregnant                         |     |             |                    |                    |                    |        |
| Ever Pregnant                         | 35  | 30 (85.7%)  | 1.00               | 1.00               | 1.00               | < .001 |
| Never Had Sex                         | 481 | 354 (73.6%) | 0.20 (0.02, 1.81)  | 0.20 (0.02, 1.79)  | 0.20 (0.02, 1.81)  |        |
| Ever had sex, never pregnant          | 31  | 30 (96.8%)  | 0.09 (0.01, 0.69)  | 0.10 (0.01, 0.72)  | 0.09 (0.01, 0.69)  |        |

^ Age was included as a continuous covariate

^^ Ever Had Sex was not included in the multivariable models, because of using a “composite” variable combining information on sexual behaviour and pregnancy

\* Fully adjusted model is adjusted for the minimal set of confounding variables identified from the DAG (i.e. all variables presented in table; excluding ‘Ever Had Sex’)

\*\* p value is from likelihood ratio test, from ‘fully adjusted’ model



**Supplementary S2(b):** Knowledge of HIV status: levels and associations with DREAMS invitation and key confounding variables estimated using conventional logistic regression in Nairobi, among 18-22 year olds

|                          | Total<br>N | Knows Status<br>n (%) | Unadjusted<br>OR (95% CI) | Age and Site Adjusted<br>OR (95% CI) | Fully Adjusted*<br>OR (95% CI) | p value** |
|--------------------------|------------|-----------------------|---------------------------|--------------------------------------|--------------------------------|-----------|
| <b>DREAMS Invitation</b> |            |                       |                           |                                      |                                |           |
| Not Invited              | 320        | 255 (79.7%)           | 1.00                      | 1.00                                 | 1.00                           | < 0.001   |
| Invited                  | 214        | 203 (94.9%)           | 4.70 (2.42, 9.15)         | 6.10 (3.08, 12.09)                   | 8.87 (4.22, 18.63)             |           |
| <b>Age &amp; Site</b>    |            |                       |                           |                                      |                                |           |
| Age                      |            |                       |                           |                                      |                                |           |
| 18                       | 138        | 110 (79.7%)           | 1.25 (1.05, 1.49)         | 1.24 (1.05, 1.48)                    | 1.08 (0.85, 1.36)              | 0.53      |
| 19                       | 95         | 83 (87.4%)            |                           |                                      |                                |           |
| 20                       | 102        | 85 (83.3%)            |                           |                                      |                                |           |
| 21                       | 94         | 84 (89.4%)            |                           |                                      |                                |           |
| 22                       | 105        | 96 (91.4%)            |                           |                                      |                                |           |
| Site                     |            |                       |                           |                                      |                                |           |
| Korogocho                | 300        | 253 (84.3%)           | 1.00                      | 1.00                                 | 1.00                           | 0.35      |
| Viwandani                | 234        | 205 (87.6%)           | 1.31 (0.80, 2.16)         | 1.26 (0.76, 2.08)                    | 1.32 (0.74, 2.37)              |           |
| <b>Education</b>         |            |                       |                           |                                      |                                |           |
| Current School           |            |                       |                           |                                      |                                |           |
| Not Currently in School  | 367        | 328 (89.4%)           | 1.00                      | 1.00                                 | 1.00                           | 0.76      |
| Currently in School      | 167        | 130 (77.8%)           | 0.42 (0.26, 0.68)         | 1.15 (0.96, 1.38)                    | 0.90 (0.45, 1.80)              |           |
| Highest Education        |            |                       |                           |                                      |                                |           |
| Primary Incomplete       | 43         | 39 (90.7%)            | 1.00                      | 1.00                                 | 1.00                           | 0.74      |
| Primary Grade 8          | 98         | 93 (94.9%)            | 1.91 (0.49, 7.48)         | 1.84 (0.46, 7.30)                    | 1.80 (0.42, 7.74)              |           |
| Secondary Form 1         | 25         | 22 (88.0%)            | 0.75 (0.15, 3.67)         | 0.99 (0.20, 4.93)                    | 0.74 (0.13, 4.34)              |           |
| Secondary Form 2         | 66         | 58 (87.9%)            | 0.74 (0.21, 2.64)         | 0.87 (0.24, 3.14)                    | 1.00 (0.24, 4.14)              |           |

|                                       |     |             |                   |                   |                   |        |
|---------------------------------------|-----|-------------|-------------------|-------------------|-------------------|--------|
| Secondary Form 3                      | 75  | 59 (78.7%)  | 0.38 (0.12, 1.22) | 0.47 (0.14, 1.54) | 0.88 (0.22, 3.54) |        |
| Secondary Form 4                      | 181 | 149 (82.3%) | 0.48 (0.16, 1.43) | 0.46 (0.15, 1.40) | 0.78 (0.22, 2.74) |        |
| Tertiary                              | 46  | 38 (82.6%)  | 0.49 (0.14, 1.75) | 0.41 (0.11, 1.50) | 0.60 (0.13, 2.75) |        |
| <b>SES</b>                            |     |             |                   |                   |                   |        |
| Household Assets                      |     |             |                   |                   |                   |        |
| Low Asset Score                       | 164 | 136 (82.9%) | 1.00              | 1.00              | 1.00              | 0.89   |
| Middle Asset Score                    | 194 | 168 (86.6%) | 1.33 (0.75, 2.38) | 1.30 (0.72, 2.33) | 1.07 (0.55, 2.11) |        |
| High Asset Score                      | 176 | 154 (87.5%) | 1.44 (0.79, 2.64) | 1.48 (0.80, 2.73) | 1.19 (0.57, 2.49) |        |
| Poverty Perception                    |     |             |                   |                   |                   |        |
| Very poor                             | 73  | 66 (90.4%)  | 1.00              | 1.00              | 1.00              | 0.25   |
| Moderately poor                       | 423 | 364 (86.1%) | 0.65 (0.29, 1.49) | 0.67 (0.29, 1.54) | 0.80 (0.31, 2.05) |        |
| Not poor                              | 38  | 28 (73.7%)  | 0.30 (0.10, 0.86) | 0.30 (0.10, 0.89) | 0.38 (0.11, 1.33) |        |
| Credit Access                         |     |             |                   |                   |                   |        |
| No Access to Credit                   | 280 | 244 (87.1%) | 1.00              | 1.00              | 1.00              | 0.85   |
| Access to Credit                      | 235 | 200 (85.1%) | 0.84 (0.51, 1.39) | 0.83 (0.50, 1.38) | 0.96 (0.54, 1.71) |        |
| Don't Know                            | 19  | 14 (73.7%)  | 0.41 (0.14, 1.22) | 0.47 (0.16, 1.41) | 1.38 (0.38, 4.96) |        |
| <b>Sexual &amp; Pregnancy history</b> |     |             |                   |                   |                   |        |
| Ever Had Sex                          |     |             |                   |                   |                   |        |
| Ever Had Sex                          | 371 | 341 (91.9%) | 1.00              | 1.00              | --                | --     |
| Never Had Sex or Undisclosed          | 163 | 117 (71.8%) | 0.22 (0.13, 0.37) | 0.23 (0.13, 0.40) | N/A^^             |        |
| Ever Pregnant                         |     |             |                   |                   |                   |        |
| Ever Pregnant                         | 268 | 252 (94.0%) | 1.00              | 1.00              | 1.00              | < .001 |
| Never Had Sex                         | 103 | 89 (86.4%)  | 0.40 (0.19, 0.86) | 0.39 (0.18, 0.85) | 0.40 (0.19, 0.86) |        |
| Ever had sex, never Pregnant          | 163 | 117 (71.8%) | 0.16 (0.09, 0.30) | 0.15 (0.08, 0.31) | 0.16 (0.09, 0.30) |        |

^ Age was included as a continuous covariate

^^ Ever Had Sex was not included in the multivariable models, because of using a “composite” variable combining information on sexual behaviour and pregnancy

\* Fully adjusted model is adjusted for the minimal set of confounding variables identified from the DAG (i.e. all variables presented in table; excluding ‘Ever Had Sex’)

\*\* p value is from likelihood ratio test, from ‘fully adjusted’ model

**Supplementary Table S3.** Estimated risk differences, risk ratios, and odds ratios from alternative approaches to regression adjustment for the propensity score, considered as sensitivity analyses.

| Analytical approach*           | Estimated % who know status if no DREAMS | 95% CI         | Estimated % who know status if DREAMS | 95% CI                | Prevalence Difference | 95% CI         | Prevalence Ratio | 95% CI       | Odds Ratio | 95% CI        |
|--------------------------------|------------------------------------------|----------------|---------------------------------------|-----------------------|-----------------------|----------------|------------------|--------------|------------|---------------|
| <b>Nairobi</b>                 |                                          |                |                                       |                       |                       |                |                  |              |            |               |
| Unadjusted Logistic Regression | 69.40                                    | (65.49, 73.23) | <b>92.16</b>                          | <b>(89.79, 94.55)</b> | <b>22.81</b>          | (18.07, 27.23) | 1.33             | (1.25, 1.41) | 5.20       | (3.71, 7.72)  |
| Adjusted Logistic Regression   | 65.64                                    | (61.59, 69.70) | <b>92.93</b>                          | <b>(90.42, 94.20)</b> | <b>27.29</b>          | (22.65, 31.44) | 1.42             | (1.33, 1.51) | 6.88       | (4.80, 9.95)  |
| PS Adjustment <sup>^</sup>     | 65.10                                    | (61.10, 68.91) | <b>92.16</b>                          | <b>(90.43, 94.84)</b> | <b>27.77</b>          | (22.84, 32.56) | 1.43             | (1.33, 1.53) | 6.98       | (4.84, 10.47) |
| PS Stratification              | 65.50                                    | (61.41, 69.58) | <b>92.82</b>                          | <b>(90.78, 94.94)</b> | <b>27.34</b>          | (22.48, 32.19) | 1.47             | (1.36, 1.63) | 7.15       | (5.08, 15.65) |
| PS Weighting                   | 65.04                                    | (60.88, 68.82) | <b>92.87</b>                          | <b>(90.58, 94.89)</b> | <b>27.83</b>          | (22.88, 33.02) | 1.43             | (1.33, 1.54) | 7.00       | (4.77, 10.60) |
| <b>South Africa</b>            |                                          |                |                                       |                       |                       |                |                  |              |            |               |
| Unadjusted Logistic Regression | 46.26                                    | (43.84, 48.66) | <b>41.82</b>                          | <b>(37.84, 45.77)</b> | <b>-4.44</b>          | (-8.75, 0.02)  | 0.90             | (0.81, 1.01) | 0.84       | (0.70, 1.00)  |
| Adjusted Logistic Regression   | 41.90                                    | (39.43, 44.29) | <b>47.11</b>                          | <b>(42.49, 51.51)</b> | <b>5.21</b>           | (0.25, 10.17)  | 1.12             | (1.00, 1.26) | 1.24       | (1.00, 1.51)  |
| PS Adjustment <sup>^</sup>     | 41.89                                    | (39.53, 44.32) | <b>46.56</b>                          | <b>(42.22, 50.71)</b> | <b>4.67</b>           | (-0.33, 9.30)  | 1.23             | (1.08, 1.41) | 1.33       | (1.09, 1.67)  |
| PS Stratification              | 42.17                                    | (39.82, 44.86) | <b>46.04</b>                          | <b>(41.54, 50.27)</b> | <b>3.87</b>           | (-1.12, 8.16)  | 1.19             | (1.03, 1.35) | 1.27       | (1.01, 1.58)  |
| PS Weighting                   | 41.82                                    | (39.29, 44.31) | <b>46.34</b>                          | <b>(41.72, 50.84)</b> | <b>4.52</b>           | (-0.64, 9.18)  | 1.11             | (0.94, 1.23) | 1.20       | (0.97, 1.48)  |

\* Each effect measure compares the % who would know their status if nobody received DREAMS to the % who would know their status if everyone received DREAMS (analogous to the interpretation of a trial). All effects obtained are marginal.

<sup>^</sup> The effect measure reported in Table 3, repeated here for comparison with alternative approaches.

**Table S4(a).** HIV testing experiences and modalities in Nairobi, overall and by DREAMS invitation stratified by age group

| All                                                                                               | Overall |         | Age Group 15-17 |         |             |         | Age Group 18-22 |         |             |         |
|---------------------------------------------------------------------------------------------------|---------|---------|-----------------|---------|-------------|---------|-----------------|---------|-------------|---------|
|                                                                                                   | N       | % (col) | Invited         |         | Not Invited |         | Invited         |         | Not Invited |         |
| Blue=Cohort who have not been tested                                                              |         |         | N               | % (col) | N           | % (col) | N               | % (col) | N           | % (col) |
| Red=Cohort who have been tested                                                                   |         |         |                 |         |             |         |                 |         |             |         |
| <b>Did you use HIV testing services in the past 12 months?</b>                                    |         |         |                 |         |             |         |                 |         |             |         |
| Yes                                                                                               | 819     | 75.8    | 287             | 89.1    | 106         | 47.1    | 193             | 90.2    | 233         | 72.8    |
| No                                                                                                | 125     | 11.6    | 19              | 5.9     | 42          | 18.7    | 13              | 6.1     | 51          | 15.9    |
| Not Ever Used or Not Aware                                                                        | 137     | 12.7    | 16              | 5.0     | 77          | 34.2    | 8               | 3.7     | 36          | 11.3    |
| <b>Was HIV testing a DREAMS program?</b>                                                          |         |         |                 |         |             |         |                 |         |             |         |
| Yes                                                                                               | 439     | 40.6    | 253             | 78.6    | 17          | 7.6     | 157             | 73.4    | 12          | 3.8     |
| No                                                                                                | 258     | 23.9    | 34              | 10.6    | 60          | 26.7    | 36              | 16.8    | 128         | 40.0    |
| Don't know                                                                                        | 3       | 0.3     | 0               | 0.0     | 0           | 0.0     | 0               | 0.0     | 3           | 0.9     |
| Didn't use HIV Testing in the past 12 months                                                      | 381     | 35.2    | 35              | 10.9    | 148         | 65.8    | 21              | 9.8     | 177         | 55.3    |
| <b>Did you use Partner testing in the past 12 months?</b>                                         |         |         |                 |         |             |         |                 |         |             |         |
| Yes                                                                                               | 211     | 19.5    | 49              | 15.2    | 9           | 4.0     | 74              | 34.6    | 79          | 24.7    |
| No                                                                                                | 51      | 4.7     | 5               | 1.6     | 4           | 1.8     | 10              | 4.7     | 32          | 10.0    |
| Not Ever Used or Not Aware                                                                        | 819     | 75.8    | 268             | 83.2    | 212         | 94.2    | 130             | 60.7    | 209         | 65.3    |
| <b>Was Partner testing a DREAMS program?</b>                                                      |         |         |                 |         |             |         |                 |         |             |         |
| Yes                                                                                               | 80      | 7.4     | 39              | 12.1    | 0           | 0.0     | 39              | 18.2    | 2           | 0.6     |
| No                                                                                                | 98      | 9.1     | 10              | 3.1     | 6           | 2.7     | 34              | 15.9    | 48          | 15.0    |
| Don't know                                                                                        | 1       | 0.1     | 0               | 0.0     | 0           | 0.0     | 1               | 0.5     | 0           | 0.0     |
| Didn't use Partner Testing in the past 12 months                                                  | 902     | 83.4    | 273             | 84.8    | 219         | 97.3    | 140             | 65.4    | 270         | 84.4    |
| <b>I feel confident that I could visit a health facility or testing center to get an HIV test</b> |         |         |                 |         |             |         |                 |         |             |         |
| Not at all true                                                                                   | 17      | 1.6     | 6               | 1.9     | 5           | 2.2     | 1               | 0.5     | 4           | 1.3     |

|                 |     |      |     |      |     |      |     |      |     |      |
|-----------------|-----|------|-----|------|-----|------|-----|------|-----|------|
| Hardly true     | 35  | 3.2  | 12  | 3.7  | 9   | 4.0  | 4   | 1.9  | 10  | 3.1  |
| Moderately true | 56  | 5.2  | 20  | 6.2  | 14  | 6.2  | 8   | 3.7  | 14  | 4.4  |
| Exactly true    | 973 | 90.0 | 284 | 88.2 | 197 | 87.6 | 201 | 93.9 | 292 | 91.3 |

**Do you know where a person can be tested for HIV?**

|     |       |      |     |      |     |      |     |       |     |      |
|-----|-------|------|-----|------|-----|------|-----|-------|-----|------|
| Yes | 1,068 | 98.8 | 321 | 99.7 | 218 | 96.9 | 214 | 100.0 | 315 | 98.4 |
| No  | 13    | 1.2  | 1   | 0.3  | 7   | 3.1  | 0   | 0.0   | 5   | 1.6  |

**Would you be able to get an HIV test if you wanted one?**

|     |       |      |     |      |     |      |     |       |     |      |
|-----|-------|------|-----|------|-----|------|-----|-------|-----|------|
| Yes | 1,063 | 98.3 | 319 | 99.1 | 215 | 95.6 | 214 | 100.0 | 315 | 98.4 |
| No  | 18    | 1.7  | 3   | 0.9  | 10  | 4.4  | 0   | 0.0   | 5   | 1.6  |

**Is it important for people to know their status?**

|     |       |      |     |      |     |      |     |      |     |      |
|-----|-------|------|-----|------|-----|------|-----|------|-----|------|
| Yes | 1,061 | 98.1 | 316 | 98.1 | 222 | 98.7 | 207 | 96.7 | 316 | 98.8 |
| No  | 20    | 1.9  | 6   | 1.9  | 3   | 1.3  | 7   | 3.3  | 4   | 1.3  |

**Have you ever been tested for HIV and received the results?**

|     |     |      |     |      |     |      |     |      |     |      |
|-----|-----|------|-----|------|-----|------|-----|------|-----|------|
| Yes | 955 | 88.3 | 309 | 96.0 | 150 | 66.7 | 209 | 97.7 | 287 | 89.7 |
| No  | 126 | 11.7 | 13  | 4.0  | 75  | 33.3 | 5   | 2.3  | 33  | 10.3 |

**[If never tested] Why have you not tested for HIV?**

|                                                                         |    |      |   |      |    |      |   |      |    |      |
|-------------------------------------------------------------------------|----|------|---|------|----|------|---|------|----|------|
| I don't think I have HIV                                                | 86 | 68.3 | 6 | 46.2 | 56 | 74.7 | 3 | 60.0 | 21 | 63.6 |
| I don't want to know my HIV status                                      | 11 | 8.7  | 3 | 23.1 | 4  | 5.3  | 0 | 0.0  | 4  | 12.1 |
| I don't know where to go for HIV testing                                | 6  | 4.8  | 0 | 0.0  | 5  | 6.7  | 0 | 0.0  | 1  | 3.0  |
| I am worried someone will see me at the clinic and think I am HIV+      | 0  | 0.0  | 0 | 0.0  | 0  | 0.0  | 0 | 0.0  | 0  | 0.0  |
| I am worried that health workers might reveal my test results to others | 0  | 0.0  | 0 | 0.0  | 0  | 0.0  | 0 | 0.0  | 0  | 0.0  |

|                                                                |    |      |   |      |   |     |   |      |   |      |
|----------------------------------------------------------------|----|------|---|------|---|-----|---|------|---|------|
| The clinic where HIV testing is available is far from my house | 3  | 2.4  | 2 | 15.4 | 1 | 1.3 | 0 | 0.0  | 0 | 0.0  |
| Other                                                          | 15 | 11.9 | 1 | 7.7  | 7 | 9.3 | 1 | 20.0 | 6 | 18.2 |
| Don't Know                                                     | 5  | 4.0  | 1 | 7.7  | 2 | 2.7 | 1 | 20.0 | 1 | 3.0  |

**[If Ever Tested] Where did your last HIV test take place?**

|                                                 |     |      |     |      |    |      |     |      |     |      |
|-------------------------------------------------|-----|------|-----|------|----|------|-----|------|-----|------|
| At a fixed health facility                      | 677 | 70.9 | 214 | 69.3 | 89 | 39.6 | 166 | 79.4 | 208 | 72.5 |
| At a mobile health facility                     | 188 | 19.7 | 65  | 21.0 | 49 | 21.8 | 26  | 12.4 | 48  | 16.7 |
| At home by provider                             | 81  | 8.5  | 27  | 8.7  | 10 | 4.4  | 16  | 7.7  | 28  | 9.8  |
| At home self testing                            | 7   | 0.7  | 3   | 1.0  | 1  | 0.4  | 0   | 0.0  | 3   | 1.0  |
| At home tested by other person partner relative | 2   | 0.2  | 0   | 0.0  | 1  | 0.4  | 1   | 0.5  | 0   | 0.0  |

**[If Ever Tested] Was the last HIV test offered, required or did you ask for the test?**

|                      |     |      |     |      |    |      |    |      |     |      |
|----------------------|-----|------|-----|------|----|------|----|------|-----|------|
| It was offered       | 430 | 45.0 | 159 | 51.5 | 66 | 29.3 | 94 | 45.0 | 110 | 34.4 |
| It was required      | 254 | 26.6 | 90  | 29.1 | 34 | 15.1 | 57 | 27.3 | 73  | 22.8 |
| I asked for the test | 270 | 28.3 | 60  | 19.4 | 49 | 21.8 | 58 | 27.8 | 104 | 32.5 |
| Don't Know           | 1   | 0.1  | 0   | 0.0  | 1  | 0.4  | 0  | 0.0  | 33  | 10.3 |

**[If Ever Tested] What was the main reason for your last HIV test?**

|                                          |     |      |     |      |    |      |     |      |     |      |
|------------------------------------------|-----|------|-----|------|----|------|-----|------|-----|------|
| To protect/take care of yourself         | 618 | 64.7 | 221 | 71.5 | 99 | 44.0 | 137 | 65.6 | 161 | 50.3 |
| To protect your partner                  | 9   | 0.9  | 2   | 0.6  | 1  | 0.4  | 2   | 1.0  | 4   | 1.3  |
| To protect unborn/future children        | 69  | 7.2  | 6   | 1.9  | 9  | 4.0  | 11  | 5.3  | 43  | 13.4 |
| To plan for the future                   | 75  | 7.9  | 27  | 8.7  | 13 | 5.8  | 16  | 7.7  | 19  | 5.9  |
| I was sick and worried                   | 21  | 2.2  | 1   | 0.3  | 5  | 2.2  | 3   | 1.4  | 12  | 3.8  |
| I had to confirm my HIV status for PEP   | 21  | 2.2  | 6   | 1.9  | 5  | 2.2  | 5   | 2.4  | 5   | 1.6  |
| My husband/partner/client wanted to know | 7   | 0.7  | 2   | 0.6  | 0  | 0.0  | 4   | 1.9  | 1   | 0.3  |
| I had unprotected sex                    | 8   | 0.8  | 1   | 0.3  | 2  | 0.9  | 2   | 1.0  | 3   | 0.9  |
| Employment requirement                   | 3   | 0.3  | 0   | 0.0  | 0  | 0.0  | 3   | 1.4  | 0   | 0.0  |
| Other (Specify)                          | 124 | 13.0 | 43  | 13.9 | 16 | 7.1  | 26  | 12.4 | 39  | 12.2 |



**[If Ever Tested] The last (most recent) time you were HIV tested, were you tested for HIV alone or with a sexual partner?**

|                                          |     |      |     |      |     |      |     |      |     |      |
|------------------------------------------|-----|------|-----|------|-----|------|-----|------|-----|------|
| Alone                                    | 867 | 90.8 | 304 | 98.4 | 145 | 64.4 | 187 | 89.5 | 231 | 72.2 |
| With partner                             | 85  | 8.9  | 4   | 1.3  | 5   | 2.2  | 20  | 9.6  | 56  | 17.5 |
| Tested alone but counselled with partner | 3   | 0.3  | 1   | 0.3  | 0   | 0.0  | 2   | 1.0  | 0   | 0.0  |

**Have you ever tested yourself for HIV using a HIV self-testing kit?**

|                                      |     |      |     |      |     |      |     |      |     |      |
|--------------------------------------|-----|------|-----|------|-----|------|-----|------|-----|------|
| Yes                                  | 31  | 2.9  | 5   | 1.6  | 3   | 1.3  | 8   | 3.7  | 15  | 4.7  |
| No                                   | 760 | 70.3 | 223 | 69.3 | 156 | 69.3 | 150 | 70.1 | 230 | 71.9 |
| Have never heard of HIV self-testing | 290 | 26.8 | 94  | 29.2 | 66  | 29.3 | 56  | 26.2 | 75  | 23.4 |

**If a simple-to-use at home, free HIV test were available to you, how interested would you be in testing yourself for HIV?**

|                       |     |      |     |      |     |      |     |      |     |      |
|-----------------------|-----|------|-----|------|-----|------|-----|------|-----|------|
| Very interested       | 783 | 72.4 | 214 | 66.5 | 151 | 67.1 | 178 | 83.2 | 240 | 75.0 |
| Somewhat interested   | 97  | 9.0  | 32  | 9.9  | 26  | 11.6 | 13  | 6.1  | 26  | 8.1  |
| Not at all interested | 198 | 18.3 | 74  | 23.0 | 48  | 21.3 | 23  | 10.7 | 53  | 16.6 |
| Don't Know            | 3   | 0.3  | 2   | 0.6  | 0   | 0.0  | 0   | 0.0  | 1   | 0.3  |

**In your opinion, are people hesitant to take an HIV test because they fear other people's reaction if the test result is positive for HIV?**

|                   |     |      |     |      |     |      |     |      |     |      |
|-------------------|-----|------|-----|------|-----|------|-----|------|-----|------|
| Yes               | 974 | 90.1 | 285 | 88.5 | 200 | 88.9 | 203 | 94.9 | 287 | 89.7 |
| No                | 94  | 8.7  | 34  | 10.6 | 20  | 8.9  | 9   | 4.2  | 30  | 9.4  |
| Don't Know/Unsure | 13  | 1.2  | 3   | 0.9  | 5   | 2.2  | 2   | 0.9  | 3   | 0.9  |

**Table S4(b).** HIV testing experience and modalities in uMkhanyakude, overall and by DREAMS invitation stratified by age group.

|                                                                          | Overall |         | 13-17   |         |             |         | 18-22   |         |             |         |
|--------------------------------------------------------------------------|---------|---------|---------|---------|-------------|---------|---------|---------|-------------|---------|
|                                                                          | N       | % (col) | Invited |         | Not invited |         | Invited |         | Not invited |         |
|                                                                          |         |         | n       | % (col) | n           | % (col) | n       | % (col) | n           | % (col) |
| <b>Did you use facility-based HIV testing services in past 12 months</b> |         |         |         |         |             |         |         |         |             |         |
| Yes                                                                      | 623     | 28.6    | 84      | 18.1    | 118         | 17.3    | 80      | 46.0    | 341         | 39.7    |
| No                                                                       | 208     | 9.5     | 28      | 6.0     | 37          | 5.4     | 29      | 16.7    | 114         | 13.3    |
| Not ever used or not aware                                               | 1349    | 61.9    | 351     | 75.8    | 529         | 77.3    | 65      | 37.4    | 404         | 47.0    |
| <b>Was the facility-based HIV testing a DREAMS program?</b>              |         |         |         |         |             |         |         |         |             |         |
| Yes                                                                      | 126     | 5.8     | 39      | 8.4     | 30          | 4.4     | 20      | 11.5    | 37          | 4.3     |
| No                                                                       | 492     | 22.6    | 45      | 9.7     | 86          | 12.6    | 60      | 34.5    | 301         | 35.0    |
| Don't know                                                               | 5       | 0.2     | 0       | 0       | 2           | 0.3     | 0       | 0       | 3           | 0.3     |
| Didn't use HIV testing in past 12 mo                                     | 1557    | 71.4    | 379     | 81.9    | 566         | 82.7    | 94      | 54      | 518         | 60.3    |
| <b>Did you use Partner testing in past 12 months?</b>                    |         |         |         |         |             |         |         |         |             |         |
| Yes                                                                      | 129     | 5.9     | 9       | 2.0     | 12          | 1.8     | 19      | 10.9    | 89          | 10.4    |
| No                                                                       | 40      | 1.8     | 0       | 0       | 4           | 0.6     | 7       | 4       | 29          | 3.4     |
| Not used or not aware                                                    | 2003    | 92.2    | 451     | 98.0    | 666         | 97.7    | 149     | 85.1    | 737         | 86.2    |
| <b>Was Partner testing a DREAMS program?</b>                             |         |         |         |         |             |         |         |         |             |         |
| Yes                                                                      | 24      | 1.1     | 6       | 1.3     | 7           | 1       | 1       | 0.6     | 10          | 1.2     |
| No                                                                       | 103     | 4.7     | 3       | 0.7     | 5           | 0.7     | 18      | 10.3    | 77          | 9       |
| Don't know                                                               | 2       | 0.1     | 0       | 0       | 0           | 0       | 0       | 0       | 2           | 0.2     |
| Didn't used partner testing in past 12 months                            | 2043    | 94.1    | 451     | 98      | 670         | 98.2    | 156     | 89.1    | 766         | 89.6    |
| <b>Did you use home testing in past 12 months?</b>                       |         |         |         |         |             |         |         |         |             |         |
| Yes                                                                      | 766     | 35.3    | 122     | 26.5    | 128         | 18.9    | 82      | 47.4    | 434         | 50.6    |
| No                                                                       | 165     | 7.6     | 11      | 2.4     | 17          | 2.5     | 18      | 10.4    | 119         | 13.9    |
| Not ever used or not aware                                               | 1239    | 57.1    | 327     | 71.1    | 534         | 78.6    | 73      | 42.2    | 305         | 35.5    |

**Was Home testing a DREAMS program?**

|                                           |      |      |     |      |     |      |    |      |     |      |
|-------------------------------------------|------|------|-----|------|-----|------|----|------|-----|------|
| Yes                                       | 140  | 6.5  | 32  | 7.0  | 31  | 4.6  | 21 | 12.1 | 56  | 6.5  |
| No                                        | 620  | 28.6 | 88  | 19.1 | 98  | 14.4 | 61 | 35.3 | 373 | 43.5 |
| Don't know                                | 7    | 0.3  | 2   | 0.4  | 0   | 0    | 0  | 0    | 5   | 0.6  |
| Didn't use home testing in past 12 months | 1403 | 64.7 | 338 | 73.5 | 550 | 81   | 91 | 52.6 | 424 | 49.4 |

**Did you mobile testing in past 12 months?**

|                            |      |     |     |      |     |     |     |      |     |      |
|----------------------------|------|-----|-----|------|-----|-----|-----|------|-----|------|
| Yes                        | 132  | 6.1 | 12  | 2.6  | 22  | 3.2 | 11  | 6.3  | 87  | 10.2 |
| No                         | 173  | 8   | 19  | 4.1  | 19  | 2.8 | 37  | 21   | 98  | 11.5 |
| Not ever used or Not aware | 1868 | 86  | 431 | 93.3 | 639 | 94  | 128 | 72.7 | 670 | 78.4 |

**Was Mobile testing a DREAMS program?**

|                                        |      |      |     |      |     |      |     |      |     |      |
|----------------------------------------|------|------|-----|------|-----|------|-----|------|-----|------|
| Yes                                    | 25   | 1.2  | 3   | 0.6  | 3   | 0.4  | 5   | 2.8  | 14  | 1.6  |
| No                                     | 99   | 4.6  | 8   | 1.7  | 16  | 2.4  | 6   | 3.4  | 69  | 8.1  |
| Don't know                             | 9    | 0.4  | 1   | 0.2  | 4   | 0.6  | 0   | 0    | 4   | 0.5  |
| Didn't use mobile testing in past 12mo | 2040 | 93.9 | 450 | 97.4 | 657 | 96.6 | 165 | 93.8 | 768 | 89.8 |

**Did you use Self testing in past 12 months?**

|                            |      |      |     |      |     |      |     |      |     |      |
|----------------------------|------|------|-----|------|-----|------|-----|------|-----|------|
| Yes                        | 34   | 1.6  | 4   | 0.9  | 6   | 0.9  | 3   | 1.7  | 21  | 2.5  |
| No                         | 20   | 0.9  | 1   | 0.2  | 3   | 0.4  | 2   | 1.1  | 14  | 1.6  |
| Not ever used or not aware | 2119 | 97.5 | 455 | 98.9 | 672 | 98.7 | 171 | 97.2 | 821 | 95.9 |

**Was Self testing a DREAMS program?**

|                                      |      |      |     |      |     |      |     |      |     |      |
|--------------------------------------|------|------|-----|------|-----|------|-----|------|-----|------|
| Yes                                  | 7    | 0.3  | 4   | 0.9  | 1   | 0.1  | 1   | 0.6  | 1   | 0.1  |
| No                                   | 26   | 1.2  | 0   | 0    | 4   | 0.6  | 2   | 1.1  | 20  | 2.3  |
| Don't know                           | 1    | 0    | 0   | 0    | 1   | 0.1  | 0   | 0    | 0   | 0    |
| Didn't use self-testing in past 12mo | 2139 | 98.4 | 456 | 99.1 | 675 | 99.1 | 173 | 98.3 | 835 | 97.5 |

**I feel confident that I can visit health facility to get an HIV test**

|                     |     |      |    |     |    |     |    |     |     |      |
|---------------------|-----|------|----|-----|----|-----|----|-----|-----|------|
| Definitely not true | 45  | 2.1  | 15 | 3.2 | 9  | 1.3 | 3  | 1.7 | 18  | 2.1  |
| Slightly true       | 114 | 5.2  | 15 | 3.2 | 32 | 4.7 | 12 | 6.8 | 55  | 6.4  |
| Probably true       | 298 | 13.7 | 41 | 8.9 | 63 | 9.2 | 8  | 4.5 | 186 | 21.7 |

|                                                                                                      |      |      |     |      |     |      |     |      |     |      |
|------------------------------------------------------------------------------------------------------|------|------|-----|------|-----|------|-----|------|-----|------|
| Definitely true                                                                                      | 1725 | 79.1 | 392 | 84.7 | 581 | 84.8 | 153 | 86.9 | 599 | 69.8 |
| <b>I feel confident that I would be able to go to a health clinic for any reason, if I wished to</b> |      |      |     |      |     |      |     |      |     |      |
| Definitely not true                                                                                  | 30   | 1.4  | 6   | 1.3  | 11  | 1.6  | 0   | 0    | 13  | 1.5  |
| Slightly true                                                                                        | 116  | 5.3  | 20  | 4.3  | 25  | 3.6  | 8   | 4.5  | 63  | 7.3  |
| Probably true                                                                                        | 278  | 12.7 | 45  | 9.7  | 65  | 9.5  | 12  | 6.8  | 156 | 18.2 |
| Definitely true                                                                                      | 1759 | 80.6 | 392 | 84.7 | 584 | 85.3 | 156 | 88.6 | 627 | 73   |
| <b>Would you be able to get HIV test if you wanted one?</b>                                          |      |      |     |      |     |      |     |      |     |      |
| Yes                                                                                                  | 2030 | 93   | 430 | 92.9 | 630 | 92.0 | 168 | 95.5 | 802 | 93.4 |
| No                                                                                                   | 142  | 6.5  | 33  | 7.1  | 52  | 7.6  | 6   | 3.4  | 51  | 5.9  |
| Prefer not to answer                                                                                 | 11   | 0.5  | 0   | 0    | 3   | 0.4  | 2   | 1.1  | 6   | 0.7  |
| <b>Is it important for people to know their status?</b>                                              |      |      |     |      |     |      |     |      |     |      |
| Yes                                                                                                  | 2080 | 95.3 | 448 | 96.8 | 640 | 93.4 | 171 | 97.2 | 821 | 95.6 |
| No                                                                                                   | 93   | 4.3  | 13  | 2.8  | 42  | 6.1  | 4   | 2.3  | 34  | 4    |
| Prefer not to answer                                                                                 | 10   | 0.5  | 2   | 0.4  | 3   | 0.4  | 1   | 0.6  | 4   | 0.5  |
| <b>Have you ever been tested for HIV and received the results</b>                                    |      |      |     |      |     |      |     |      |     |      |
| Yes                                                                                                  | 1337 | 61.5 | 223 | 48.5 | 253 | 37.0 | 134 | 76.1 | 727 | 85.1 |
| No                                                                                                   | 828  | 38.1 | 236 | 51.3 | 428 | 62.7 | 41  | 23.3 | 123 | 14.4 |
| Prefer not to answer                                                                                 | 8    | 0.4  | 1   | 0.2  | 2   | 0.3  | 1   | 0.6  | 4   | 0.5  |
| <b>Where did your last HIV test take place?</b>                                                      |      |      |     |      |     |      |     |      |     |      |
| Health facility/clinic                                                                               | 935  | 69.9 | 108 | 48.2 | 158 | 62.5 | 95  | 70.9 | 574 | 79   |
| Mobile clinic                                                                                        | 108  | 8.1  | 33  | 14.7 | 23  | 9.1  | 9   | 6.7  | 43  | 5.9  |
| Home                                                                                                 | 254  | 19   | 68  | 30.4 | 68  | 26.9 | 26  | 19.4 | 92  | 12.7 |
| Other, specify                                                                                       | 41   | 3.1  | 15  | 6.7  | 4   | 1.6  | 4   | 3    | 18  | 2.5  |
| <b>Was the last HIV test offered, required or did you ask for the test?</b>                          |      |      |     |      |     |      |     |      |     |      |
| Offered                                                                                              | 367  | 27.4 | 119 | 53.1 | 85  | 33.6 | 31  | 23.1 | 132 | 18.2 |
| Required                                                                                             | 376  | 28.1 | 34  | 15.2 | 55  | 21.7 | 37  | 27.6 | 250 | 34.4 |

|                                                                     |      |      |     |      |     |      |     |      |     |      |
|---------------------------------------------------------------------|------|------|-----|------|-----|------|-----|------|-----|------|
| Asked for it                                                        | 595  | 44.5 | 71  | 31.7 | 113 | 44.7 | 66  | 49.3 | 345 | 47.5 |
| <b>What was the main reason for your last HIV test?</b>             |      |      |     |      |     |      |     |      |     |      |
| To protect myself                                                   | 707  | 52.8 | 137 | 60.9 | 159 | 62.8 | 50  | 37.3 | 361 | 49.7 |
| To protect partner                                                  | 7    | 0.5  | 0   | 0    | 2   | 0.8  | 1   | 0.7  | 4   | 0.6  |
| To protect unborn child                                             | 167  | 12.5 | 7   | 3.1  | 15  | 5.9  | 14  | 10.4 | 131 | 18.0 |
| To prepare for the future                                           | 212  | 15.8 | 35  | 15.6 | 39  | 15.4 | 17  | 12.7 | 121 | 16.7 |
| Other, specify                                                      | 245  | 18.3 | 46  | 20.4 | 38  | 15.0 | 52  | 38.8 | 109 | 15.0 |
| <b>Did you receive any counselling prior to your last HIV test?</b> |      |      |     |      |     |      |     |      |     |      |
| Yes                                                                 | 1142 | 85.4 | 193 | 86.2 | 221 | 87.4 | 122 | 91.0 | 606 | 83.4 |
| No                                                                  | 191  | 14.3 | 29  | 12.9 | 32  | 12.6 | 11  | 8.2  | 119 | 16.4 |
| Prefer not to answer                                                | 5    | 0.4  | 2   | 0.9  | 0   | 0    | 1   | 0.7  | 2   | 0.3  |
| <b>Have you ever had a positive HIV test result?</b>                |      |      |     |      |     |      |     |      |     |      |
| Yes                                                                 | 129  | 9.3  | 10  | 4.2  | 15  | 5.7  | 13  | 8.9  | 91  | 12.4 |
| No                                                                  | 1241 | 89.8 | 227 | 94.6 | 247 | 93.6 | 132 | 90.4 | 635 | 86.7 |
| Prefer not to answer                                                | 12   | 0.9  | 3   | 1.3  | 2   | 0.8  | 1   | 0.7  | 6   | 0.8  |
